# Supplementary material for: Reverse ADOR: reconstruction of UTL zeolite from layered IPC-1P
Source: Royal Society of Chemistry journal article supplement (doi:10.1039/d1ma00212k), 2021-01-01
Supplement: d1ma00212k1.pdf [file d1ma00212k1.pdf]

## Supporting Information

### Reverse ADOR: Reconstruction of UTL zeolite from layered IPC-1P

Ondřej Veselý<sup>1</sup>, Pavla Eliášová<sup>1</sup>, Russell E. Morris<sup>2\*</sup> and Jiří Čejka<sup>1\*</sup>

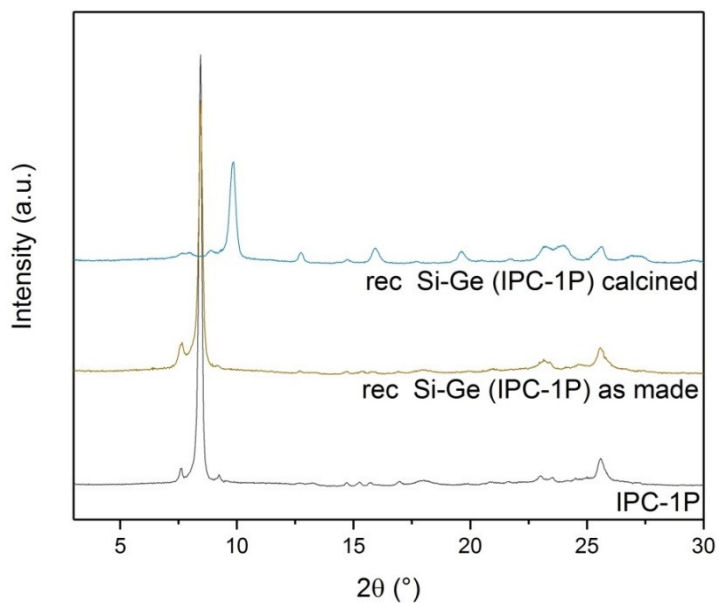

Figure S1: Powder XRD patterns of the parent IPC-1P sample (bottom), the sample treated with a mixture of  $(\text{EtO})_2\text{Me}_2\text{Si}$  and  $(\text{MeO})_4\text{Ge}$  (middle) and the calcined sample (top).

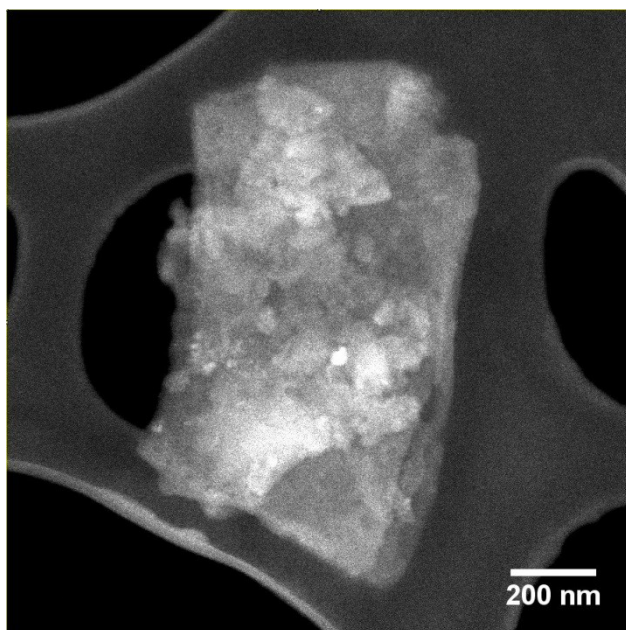

Figure S2: STEM image of the rec Ge sample

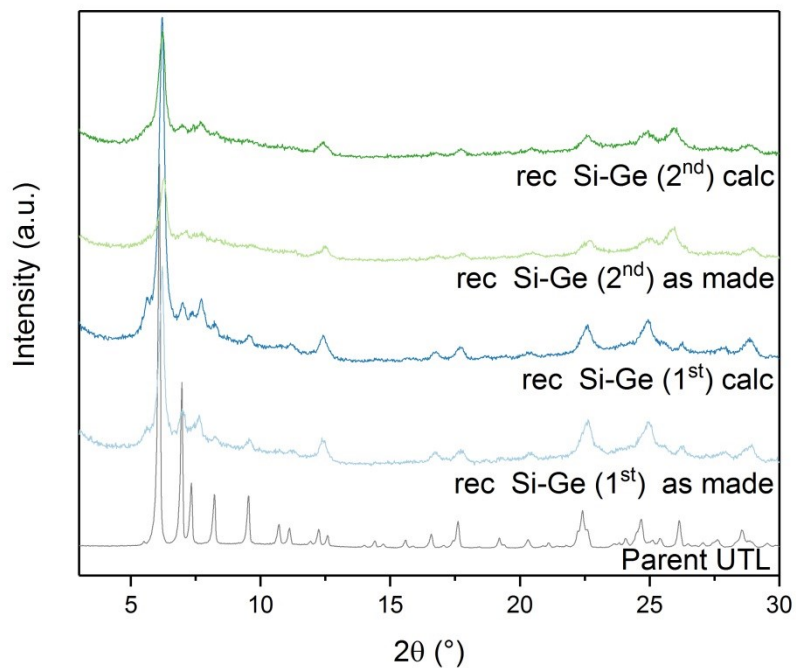

Figure S3: Powder XRD patterns of samples after the 1<sup>st</sup> and 2<sup>nd</sup> reconstruction cycle

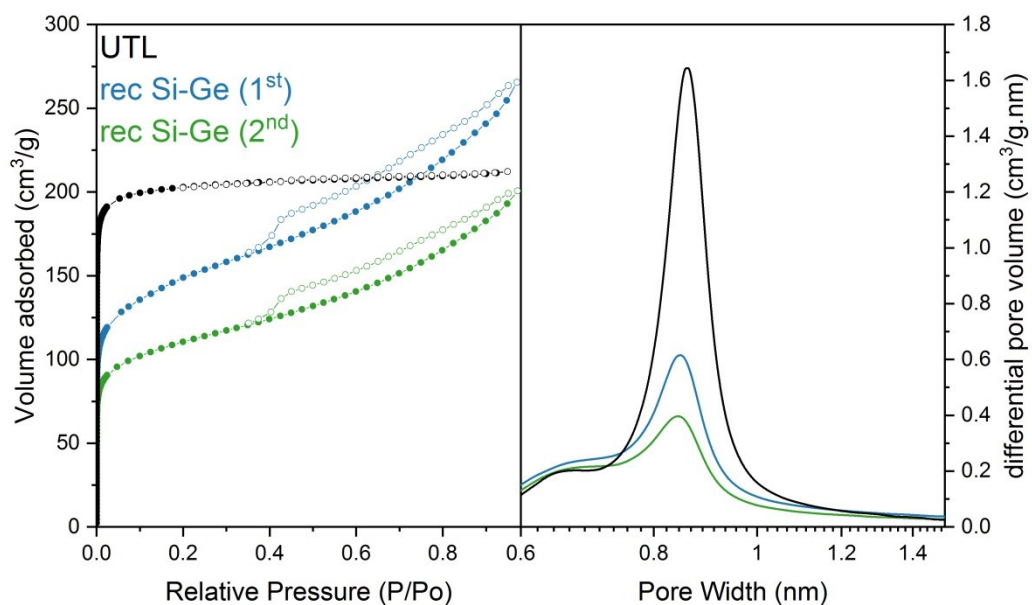

Figure S4: Argon adsorption-desorption isotherms (left) and H-K micropore size distributions (right) of samples after the 1<sup>st</sup> and 2<sup>nd</sup> reconstruction cycle

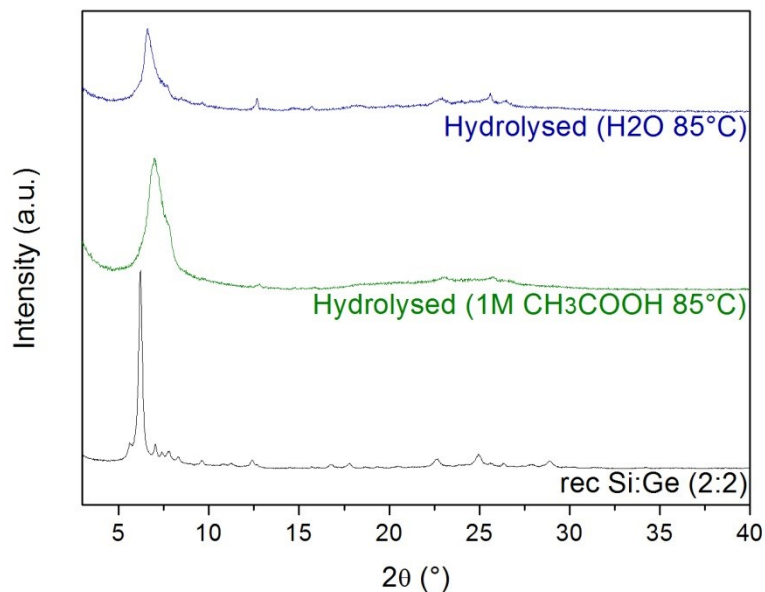

Figure S5: Powder XRD patterns of reconstructed UTL sample before and after hydrolysis in H<sub>2</sub>O and acetic acid

Table S1: Textural properties of samples after the 1<sup>st</sup> and 2<sup>nd</sup> reconstruction cycle determined by Ar adsorption

|                     | BET (m <sup>2</sup> /g) | S <sub>ext</sub> (m <sup>2</sup> /g) | V <sub>tot</sub> (cm <sup>3</sup> /g) | V <sub>mic</sub> (cm <sup>3</sup> /g) |
|---------------------|-------------------------|--------------------------------------|---------------------------------------|---------------------------------------|
| Parent <b>UTL</b>   | 620                     | 52                                   | 0.27                                  | 0.25                                  |
| 1 <sup>st</sup> run | 456                     | 164                                  | 0.34                                  | 0.10                                  |
| 2 <sup>nd</sup> run | 335                     | 127                                  | 0.26                                  | 0.08                                  |

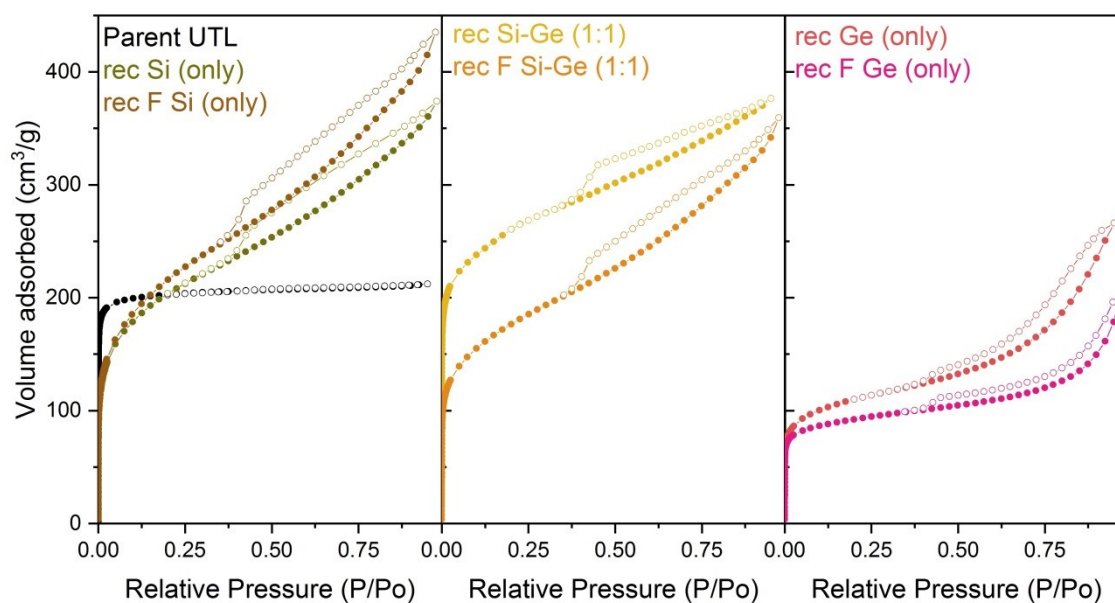

Figure S6: Argon adsorption-desorption isotherms of samples after reconstruction

with different Si:Ge compositions, with and without  $\text{NH}_4\text{F}$

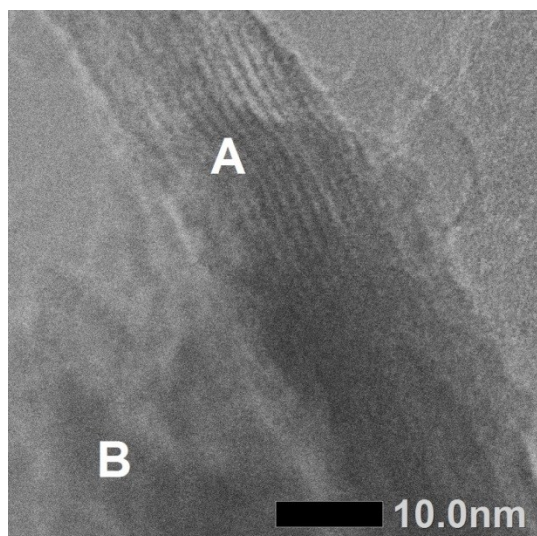

Figure S7: STEM image of the sample rec Si-Ge (1:1) reconstructed in presence of  $\text{NH}_4\text{F}$ , showing both crystalline (A) and amorphous (B) phases

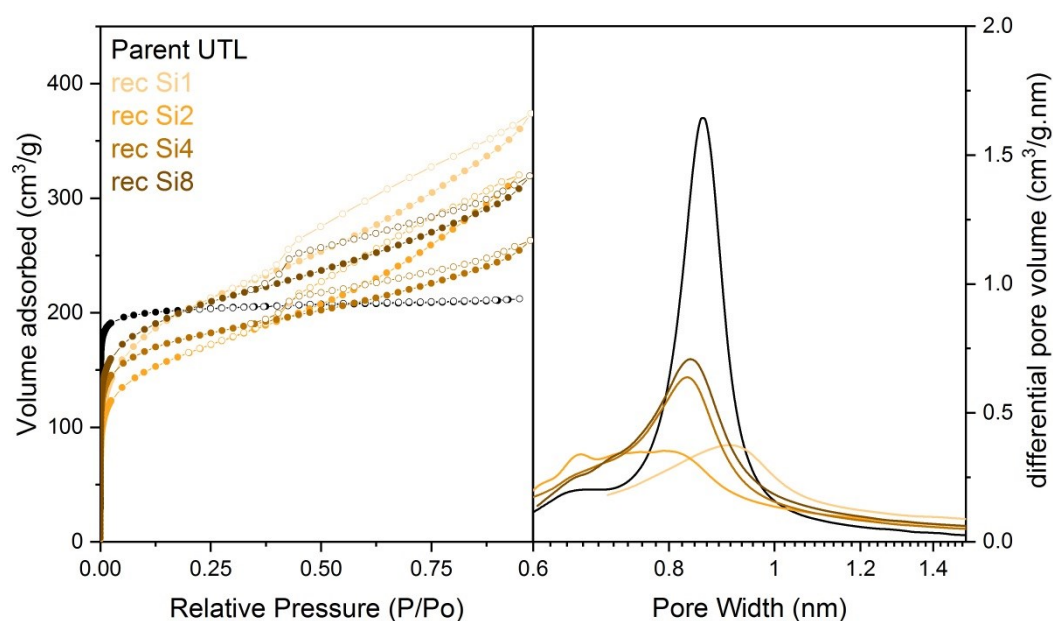

Figure S8: Argon adsorption-desorption isotherms (left) and H-K micropore size distributions (right) of the samples after D4R reconstruction with different Si sources

Table S2: Textural properties of the samples after D4R reconstruction with different Si sources determined by Ar adsorption

|            | BET (m <sup>2</sup> /g) | $S_{\text{ext}}$ (m <sup>2</sup> /g) | $V_{\text{tot}}$ (cm <sup>3</sup> /g) | $V_{\text{mic}}$ (cm <sup>3</sup> /g) |
|------------|-------------------------|--------------------------------------|---------------------------------------|---------------------------------------|
| <b>UTL</b> | 620                     | 52                                   | 0.27                                  | 0.25                                  |
| Si1        | 645                     | 334                                  | 0.48                                  | 0.12                                  |

|     |     |     |      |      |
|-----|-----|-----|------|------|
| Si2 | 542 | 172 | 0.34 | 0.09 |
| Si4 | 555 | 131 | 0.34 | 0.14 |
| Si8 | 633 | 188 | 0.41 | 0.13 |
